# Supplementary material
Source: PubMed Central journal article supplement (PMC8931858)
Supplement: NIHMS1779128-supplement-SDC.pdf [file NIHMS1779128-supplement-SDC.pdf]

## **SUPPLEMENTAL MATERIAL**

Supplemental Figure S1 and Figure Legend

Supplemental Tables S1 through S8

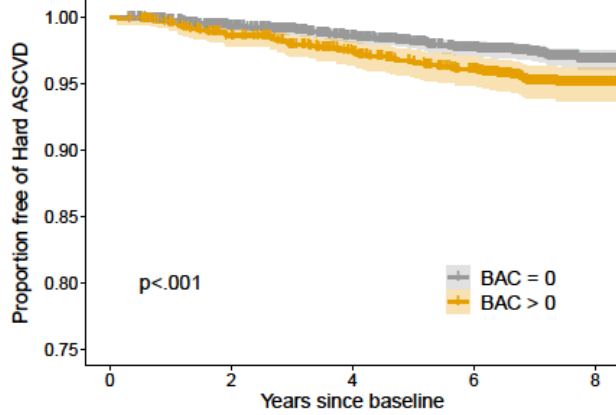

Number at risk

|   |      |      |      |      |     |
|---|------|------|------|------|-----|
| — | 3721 | 3545 | 3338 | 3153 | 148 |
| — | 1338 | 1287 | 1221 | 1137 | 77  |

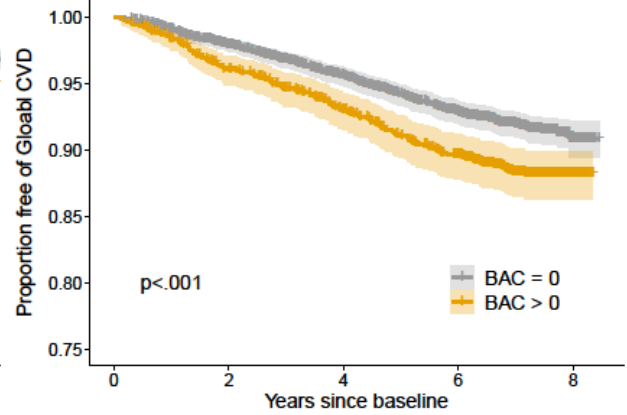

Number at risk

|   |      |      |      |      |     |
|---|------|------|------|------|-----|
| — | 3704 | 3478 | 3224 | 2993 | 140 |
| — | 1331 | 1250 | 1161 | 1056 | 69  |

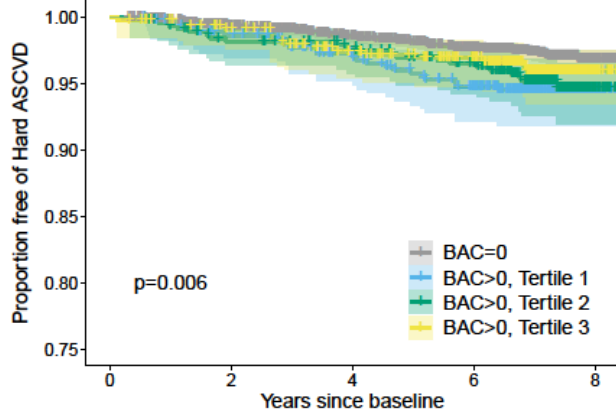

Number at risk

|   |      |      |      |      |     |
|---|------|------|------|------|-----|
| — | 3721 | 3545 | 3338 | 3153 | 148 |
| — | 446  | 430  | 406  | 376  | 27  |
| — | 446  | 428  | 415  | 393  | 27  |
| — | 446  | 429  | 400  | 368  | 23  |

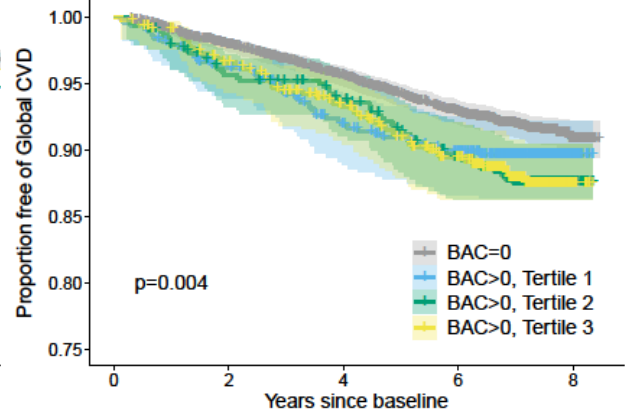

Number at risk

|   |      |      |      |      |     |
|---|------|------|------|------|-----|
| — | 3704 | 3478 | 3224 | 2993 | 140 |
| — | 444  | 417  | 382  | 355  | 26  |
| — | 443  | 415  | 397  | 363  | 23  |
| — | 444  | 418  | 382  | 338  | 20  |

## Figure Legend

**Kaplan-Meier Survival Curves for BAC=0 mg vs. BAC > 0 mg and Tertiles of BAC when BAC Present;  
BAC: breast arterial calcification.**

**Table S1.** Codes for CVD Outcome Ascertainment.

|                                                 | ICD-9                                                                                                                                                           | ICD-10                                                                                      | CPT4 Procedure Codes                                                                                                                                                         |
|-------------------------------------------------|-----------------------------------------------------------------------------------------------------------------------------------------------------------------|---------------------------------------------------------------------------------------------|------------------------------------------------------------------------------------------------------------------------------------------------------------------------------|
| Coronary Heart Disease                          |                                                                                                                                                                 |                                                                                             |                                                                                                                                                                              |
| Acute myocardial infarction                     | 410, 412                                                                                                                                                        | I21, I22, I25.6                                                                             |                                                                                                                                                                              |
| Coronary angioplasty/stent/bypass graft surgery | 36.01, 36.02, 36.03, 36.05, 36.06, 36.07, 36.09, 36.10, 36.11, 36.12, 36.13, 36.14, 36.15, 36.16, 36.17, 36.19, 36.03, 36.2, 36.3, 00.66, 295.5, V45.81, V45.82 | ICD-10-PCS: 0210*, 0211*, 0212*, 0213*, 2703*, 02713*, 02723*, 02733*, Z95.5, Z98.61        | 92980, 92981, 92982, 92984, 92995, 92996, 92975, 92977, 33510, 33511, 92920, 92921, 92924, 92925, 92928, 92929, 92933, 92934, 92937, 92938, 92941, 92943, 92944, 33510-33536 |
| Cerebrovascular Disease                         |                                                                                                                                                                 |                                                                                             |                                                                                                                                                                              |
| Ischemic stroke                                 | 433.01, 433.11, 433.21, 433.31, 433.81, 433.91, 434.01, 434.11, 434.91, 437.0, 437.1                                                                            | I63, I67.89, I69.320, I69.398                                                               |                                                                                                                                                                              |
| Hemorrhagic stroke                              | 430, 431, 432.1, 432.9                                                                                                                                          | I60, I61, I62                                                                               |                                                                                                                                                                              |
| Heart failure                                   | 428.**, 402.01, 402.11, 402.91, 398.91, 404.01, 404.03, 404.11, 404.13, 404.91, 404.93                                                                          | I50.**, I11.0, I09.81, I13.0, I13.2                                                         |                                                                                                                                                                              |
| Cardiomyopathy                                  | 425.0, 425.18, 425.2, 425.3, 425.4, 425.5, 425.6, 425.7, 425.8, 425.9, 429.8                                                                                    | I42.0, I42.1, I42.2, I42.3, I42.4, I42.5, I42.6, I42.7, I42.8, I42.9, I43.**, I25.5, I51.81 |                                                                                                                                                                              |

|                                         |                                                                                                   |                                                                                                                                                                                                                                                                                                                                                                                                                                                                                                            |                                                                                                                         |
|-----------------------------------------|---------------------------------------------------------------------------------------------------|------------------------------------------------------------------------------------------------------------------------------------------------------------------------------------------------------------------------------------------------------------------------------------------------------------------------------------------------------------------------------------------------------------------------------------------------------------------------------------------------------------|-------------------------------------------------------------------------------------------------------------------------|
| Deep vein thrombosis\pulmonary embolism | 451.9, 362.36,<br>415.11, 415.12,<br>415.13, 415.19,<br>453.2, 453.6,<br>453.81, 453.82,<br>453.9 | I26.0, I26.99, I80.01,<br>V12.51                                                                                                                                                                                                                                                                                                                                                                                                                                                                           |                                                                                                                         |
| Cardiac arrest                          | 427.5                                                                                             | I46.2, I46.8, I46.9                                                                                                                                                                                                                                                                                                                                                                                                                                                                                        |                                                                                                                         |
| Peripheral arterial disease             | 440, 441, 442,<br>443, 444, 445,<br>447, 448                                                      | I70, I71, I72, I73, I74,<br>I75, I77, I78, I79                                                                                                                                                                                                                                                                                                                                                                                                                                                             | 37220, 37221, 37222, 37223,<br>37224, 37225, 37226, 37227,<br>37228, 37229, 37230, 37231,<br>37232, 37233, 37234, 37235 |
| Retinal vascular occlusion              | 362.3                                                                                             | G45.3, H34.00,<br>H34.01, H34.02,<br>H34.03, H34.9,<br>H34.10, H34.11,<br>H34.12, H34.13,<br>H34.211, H34.212,<br>H34.213, H34.219,<br>H34.231, H34.232,<br>H34.233, H34.239,<br>H34.821, H34.822,<br>H34.823, H34.829,<br>H34.8110, H34.8111,<br>H34.8112, H34.8120,<br>H34.8121, H34.8122,<br>H34.8130, H34.8131,<br>H34.8132, H34.8190,<br>H34.8191, H34.8192,<br>H34.8310, H34.8311,<br>H34.8312, H34.8320,<br>H34.8321, H34.8322,<br>H34.8330, H34.8331,<br>H34.8332, H34.8390,<br>H34.8391, H34.8392 |                                                                                                                         |
| CVD Death                               | 390-459                                                                                           | I00-I99                                                                                                                                                                                                                                                                                                                                                                                                                                                                                                    |                                                                                                                         |

CVD: cardiovascular disease; ICD-9: International classification of diseases 9<sup>th</sup> revision; ICD-10: International classification of diseases 10<sup>th</sup> revision; CPT4: current procedure terminology, 4<sup>th</sup> edition

**Table S2.** Results of electronic chart review adjudication of 20% of events (n=85)

|                             | Total | Confirmed |    | PPV  | Notes |
|-----------------------------|-------|-----------|----|------|-------|
|                             |       | Yes       | No |      |       |
| Acute myocardial infarction | 10    | 10        | 0  | 100% |       |
| Coronary revascularization  | 2     | 2         |    | 100% |       |
| Ischemic stroke             | 14    | 14        | 0  | 100% |       |
| CVD death                   | 7     | 6         | 1  | 86%  | see a |
| Hemorrhagic stroke          | 3     | 2         | 1  | 67%  | see b |
| PAD                         | 23    | 22        | 1  | 96%  | see c |
| Heart failure               | 23    | 20        | 3  | 87%  | see d |
| Cardiac arrest              | 1     | 1         | 0  | 100% |       |
| Cardiomyopathy              | 1     | 1         | 0  | 100% |       |
| Retinal occlusion           | 1     | 1         | 0  | 100% |       |
|                             | 85    | 79        | 6  | 93%  |       |

a: 1 false + case was PE in metastatic glioblastoma multiforme of the brain

b: 1 false + case was traumatic subdural hematoma

c: 1 false + case was peripheral neuropathy

d: 3 false + cases: 1 diastolic dysfunction in the context of sepsis, 1 mitral regurgitation, 1 traumatic subdural hematoma and hypervolemia following motor vehicle accident

PPV: positive predictive value; CVD: cardiovascular disease; PE: pulmonary embolism; PAD: peripheral arterial disease

**Table S3.** Hazard Ratios of ASCVD and Global CVD Associated with BAC Gradation Using Three Different Upper BAC Thresholds.

| <b>Hard ASCVD (n=5,059; 155 events)</b>                  | <b>Model 1 HR*</b><br>(95% CI) | <b>P</b> | <b>Model 2 HR†</b><br>(95% CI) | <b>p</b> | <b>Number events/Number subjects</b> |
|----------------------------------------------------------|--------------------------------|----------|--------------------------------|----------|--------------------------------------|
| <b>80<sup>th</sup> Percentile Threshold</b>              |                                |          |                                |          |                                      |
| BAC present ≤ 80 <sup>th</sup> percentile vs. BAC = 0 mg | 1.66 (1.17-2.35)               | 0.004    | 1.61 (1.13-2.28)               | 0.008    | 50/1071                              |
| BAC present > 80 <sup>th</sup> percentile vs. BAC = 0 mg | 1.24 (0.64-2.42)               | 0.53     | 1.21 (0.62-2.35)               | 0.58     | 10/267                               |
| <b>90<sup>th</sup> Percentile Threshold</b>              |                                |          |                                |          |                                      |
| BAC present ≤ 90 <sup>th</sup> percentile vs. BAC = 0 mg | 1.59 (1.31-2.24)               | 0.008    | 1.54 (1.10-2.17)               | 0.01     | 54/1205                              |
| BAC present > 90 <sup>th</sup> percentile vs. BAC = 0 mg | 1.45 (0.62-3.37)               | 0.39     | 1.39 (0.60-3.22)               | 0.44     | 6/133                                |
| <b>95<sup>th</sup> Percentile Threshold</b>              |                                |          |                                |          |                                      |
| BAC present ≤ 95 <sup>th</sup> percentile vs. BAC = 0 mg | 1.56 (1.11-2.18)               | 0.01     | 1.51 (1.08-2.11)               | 0.02     | 56/1272                              |
| BAC present > 95 <sup>th</sup> percentile vs. BAC = 0 mg | 1.96 (0.71-5.42)               | 0.19     | 1.79 (0.65-4.94)               | 0.26     | 4/66                                 |
| <b>Global CVD (n=5,035; 427 events)</b>                  |                                |          |                                |          |                                      |
| <b>80<sup>th</sup> Percentile Threshold</b>              |                                |          |                                |          |                                      |
| BAC present ≤ 80 <sup>th</sup> percentile vs. BAC = 0 mg | 1.26 (1.01-1.57)               | 0.04     | 1.23 (0.99-1.54)               | 0.07     | 113/1065                             |
| BAC present > 80 <sup>th</sup> percentile vs. BAC = 0 mg | 1.34 (0.92-1.94)               | 0.12     | 1.32 (0.91-1.91)               | 0.14     | 33/266                               |
| <b>90<sup>th</sup> Percentile Threshold</b>              |                                |          |                                |          |                                      |
| BAC present ≤ 90 <sup>th</sup> percentile vs. BAC = 0 mg | 1.19 (0.96-1.48)               | 0.11     | 1.17 (0.94-1.45)               | 0.16     | 121/1198                             |
| BAC present > 90 <sup>th</sup> percentile vs. BAC = 0 mg | 2.04 (1.34-3.12)               | 0.0009   | 1.98 (1.30-3.01)               | 0.002    | 25/133                               |
| <b>95<sup>th</sup> Percentile Threshold</b>              |                                |          |                                |          |                                      |
| BAC present ≤ 95 <sup>th</sup> percentile vs. BAC = 0 mg | 1.20 (0.97-1.48)               | 0.10     | 1.17 (0.95-1.45)               | 0.14     | 129/1265                             |
| BAC present > 95 <sup>th</sup> percentile vs. BAC = 0 mg | 2.90 (1.75-4.79)               | <.0001   | 2.68 (1.62-4.44)               | 0.0001   | 17/66                                |

80<sup>th</sup>, 90<sup>th</sup> and 95<sup>th</sup> BAC percentiles among those with BAC present

\*age, race, education level

† + glycemic status, smoking, LDL-C and hypertension

BAC: breast arterial calcification; LDL: low-density lipoprotein; CVD: cardiovascular disease; ASCVD: atherosclerotic cardiovascular disease; HR: hazard ratio.

**Table S4.** ASCVD Risk by Joint Categories of 10-year Pooled Cohort Equations and BAC (n=5,059).

| Joint Categories of 10-year Pooled Cohort Equations Risk and Presence vs. Absence of BAC | Number of Women in Category | Number of events | Raw rates per 1,000 person-years | Unadjusted HR (95% CI) | p      | Adjusted* HR (95% CI) | p      |
|------------------------------------------------------------------------------------------|-----------------------------|------------------|----------------------------------|------------------------|--------|-----------------------|--------|
| < 5% with BAC = 0 mg                                                                     | 1343                        | 15               | 1.73                             | 1.00                   |        | 1.00                  |        |
| < 5% with BAC > 0 mg                                                                     | 343                         | 9                | 3.96                             | 2.28 (1.00-5.21)       | 0.05   | 2.28 (1.00-5.21)      | 0.05   |
| 5 to < 7.5% with BAC = 0 mg                                                              | 852                         | 25               | 4.49                             | 2.60 (1.37-4.93)       | 0.004  | 2.60 (1.37-4.94)      | 0.003  |
| 5 to < 7.5% with BAC > 0 mg                                                              | 272                         | 6                | 3.31                             | 1.91 (0.74-4.92)       | 0.18   | 1.93 (0.75-4.97)      | 0.17   |
| 7.5 to < 10% with BAC = 0 mg                                                             | 498                         | 15               | 4.58                             | 2.64 (1.29-5.41)       | 0.008  | 2.65 (1.30-5.42)      | 0.008  |
| 7.5 to < 10% with BAC > 0 mg                                                             | 190                         | 12               | 9.49                             | 5.47 (2.56-11.69)      | <.0001 | 5.53 (2.59-11.81)     | <.0001 |
| ≥ 10% with BAC=0                                                                         | 1028                        | 40               | 6.00                             | 3.47 (1.92-6.29)       | <.0001 | 3.52 (1.94-6.38)      | <.0001 |
| ≥ 10% with BAC>0                                                                         | 533                         | 33               | 9.26                             | 5.35 (2.91-9.85)       | <.0001 | 5.43 (2.94-10.01)     | <.0001 |

Global CVD Risk by Joint Categories of 10-year Pooled Cohort Equations and BAC (n=5,059).

| Joint Categories of 10-year Pooled Cohort Equations Risk and Presence vs. Absence of BAC | Number of Women in Category | Number of events | Raw rates per 1,000 person-years | Unadjusted HR (95% CI) | p      | Adjusted* HR (95% CI) | p      |
|------------------------------------------------------------------------------------------|-----------------------------|------------------|----------------------------------|------------------------|--------|-----------------------|--------|
| < 5% with BAC = 0 mg                                                                     | 1339                        | 67               | 7.88                             | 1.00                   |        | 1.00                  |        |
| < 5% with BAC > 0 mg                                                                     | 340                         | 17               | 7.67                             | 0.98 (0.57-1.66)       | 0.93   | 0.98 (0.57-1.66)      | 0.93   |
| 5 to < 7.5% with BAC = 0 mg                                                              | 849                         | 57               | 10.49                            | 1.33 (0.93-1.89)       | 0.12   | 1.33 (0.93-1.89)      | 0.12   |
| 5 to < 7.5% with BAC > 0 mg                                                              | 272                         | 23               | 13.15                            | 1.68 (1.04-2.69)       | 0.03   | 1.67 (1.04-2.68)      | 0.03   |
| 7.5 to < 10% with BAC = 0 mg                                                             | 496                         | 47               | 14.96                            | 1.89 (1.30-2.75)       | 0.0008 | 1.89 (1.30-2.74)      | 0.0008 |
| 7.5 to < 10% with BAC > 0 mg                                                             | 188                         | 19               | 15.42                            | 1.96 (1.18-3.26)       | 0.01   | 1.95 (1.17-3.24)      | 0.01   |
| ≥ 10% with BAC=0                                                                         | 1020                        | 110              | 17.31                            | 2.19 (1.62-2.97)       | <.0001 | 2.18 (1.61-2.95)      | <.0001 |
| ≥ 10% with BAC>0                                                                         | 531                         | 87               | 26.08                            | 3.32 (2.41-4.56)       | <.0001 | 3.29 (2.39-4.53)      | <.0001 |

\*adjusted for education level

BAC: breast arterial calcification; CVD: cardiovascular disease; ASCVD: atherosclerotic cardiovascular disease; HR: hazard ratio.



**Table S5.** Calibration, Discrimination and Reclassification of ASCVD (n=5,059).

| <b>Variables in the Model</b>                                                            |                           |
|------------------------------------------------------------------------------------------|---------------------------|
| <b>Calibration<br/>(Greenwood-D'Agostino-Nam Test)<br/>Chi-square (df); p-value</b>      |                           |
| PCE only                                                                                 | 8.0 (df=9); 0.53          |
| PCE, BAC (0 vs > 0 mg)                                                                   | 8.3 (df=9); 0.51          |
| PCE, BAC (4-level variable)*                                                             | 16.9 (df=9); 0.05         |
| <b>Discrimination<br/>C-index (95% CI); p-value</b>                                      |                           |
| PCE only                                                                                 | 63.4 (59.3, 67.4)         |
| PCE, BAC (0 vs > 0 mg)                                                                   | 64.3 (60.3, 68.5)<br>0.28 |
| PCE, BAC (4-level variable)*                                                             | 64.0 (60.0, 68.0)<br>0.27 |
| <b>Overall Category-based† Net Reclassification Improvement [NRI] (95% CI); p-value</b>  |                           |
| Adding BAC (0 vs > 0 mg)                                                                 | 0.12 (0.03,0.22); 0.01    |
| Adding BAC (4-level variable)*                                                           | 0.07 (0.00,0.14); 0.06    |
| <b>Bias-corrected clinical Net Reclassification Improvement [cNRI] (95% CI); p-value</b> |                           |
| Adding BAC (0 vs >0 mg)                                                                  | 0.11 (0.01,0.22); 0.04    |
| Adding BAC (4-level variable)*                                                           | 0.07 (0.00,0.15); 0.07    |

\* 4-levels of BAC: BAC=0 and tertiles when BAC > 0 mg  
PCE was transformed using a  $\log(-\log(1-x))$  function  
Categories of PCE: <5%, 5 to <7.5%, 7.5 to <20%,  $\geq$  20%

**Table S6.**

**NRI reclassification table for expected ASCVD events by Kaplan-Meier using 5-year time horizon**

| Model with PCE only | Model with PCE + BAC (0 vs. > 0 mg) |             |              |       |
|---------------------|-------------------------------------|-------------|--------------|-------|
|                     | <5%                                 | 5 to < 7.5% | 7.5 to < 20% | >=20% |
| <5%                 | 13                                  | 4           | 1            | 0     |
| 5 to < 7.5%         | 2                                   | 17          | 6            | 0     |
| 7.5 to < 20%        | 0                                   | 4           | 47           | 7     |
| >=20%               | 0                                   | 0           | 3            | 7     |

**NRI reclassification table for expected non-ASCVD events by Kaplan-Meier using 5-year time horizon**

| Model with PCE only | Model with PCE + BAC (0 vs. > 0 mg) |             |              |       |
|---------------------|-------------------------------------|-------------|--------------|-------|
|                     | <5%                                 | 5 to < 7.5% | 7.5 to < 20% | >=20% |
| <5%                 | 1,446                               | 187         | 34           | 0     |
| 5 to < 7.5%         | 372                                 | 460         | 265          | 0     |
| 7.5 to < 20%        | 0                                   | 357         | 1,310        | 157   |
| >=20%               | 0                                   | 0           | 107          | 246   |

NRI + = 0.084; NRI - = 0.039; NRI = 0.123

Crude clinical NRI = 0.189; Expected clinical NRI = 0.074; corrected clinical NRI = 0.115

BAC: breast arterial calcification; ASCVD: atherosclerotic cardiovascular disease; NRI: net reclassification improvement; PCE: pooled cohorts equation

**NRI reclassification table for expected ASCVD events by Kaplan-Meier using 5-year time horizon**

| Model with PCE only | Model with PCE + 4-level BAC variable using tertiles when BAC>0 |             |              |       |
|---------------------|-----------------------------------------------------------------|-------------|--------------|-------|
|                     | <5%                                                             | 5 to < 7.5% | 7.5 to < 20% | >=20% |
| <5%                 | 14                                                              | 4           | 0            | 0     |
| 5 to < 7.5%         | 1                                                               | 20          | 4            | 0     |
| 7.5 to < 20%        | 0                                                               | 1           | 54           | 3     |
| >=20%               | 0                                                               | 0           | 3            | 7     |

**NRI reclassification table for expected non-ASCVD events by Kaplan-Meier using 5-year time horizon**

| Model with PCE only | Model with PCE + 4-level BAC variable using tertiles when BAC>0 |             |              |       |
|---------------------|-----------------------------------------------------------------|-------------|--------------|-------|
|                     | <5%                                                             | 5 to < 7.5% | 7.5 to < 20% | >=20% |
| <5%                 | 1,549                                                           | 117         | 0            | 0     |
| 5 to < 7.5%         | 173                                                             | 792         | 131          | 0     |
| 7.5 to < 20%        | 0                                                               | 165         | 1,573        | 85    |
| >=20%               | 0                                                               | 0           | 59           | 295   |

\*: 4-level categories of BAC: BAC=0 and tertiles of BAC>0

NRI + = 0.056; NRI - = 0.013; NRI = 0.068

Crude clinical NRI = 0.100; Expected clinical NRI = 0.030; corrected clinical NRI = 0.070

BAC: breast arterial calcification; ASCVD: atherosclerotic cardiovascular disease; NRI: net reclassification improvement; PCE: pooled cohorts equation

**Table S7.** Sensitivity Analysis of Hazard Ratios of ASCVD and Global CVD Associated with BAC Presence and Gradation Among Women not on Cholesterol Lowering Drugs.

|                                              | <b>Model 1 HR*<br/>(95% CI)</b> | <b>P</b> | <b>Model 2 HR†<br/>(95% CI)</b> | <b>p</b> |
|----------------------------------------------|---------------------------------|----------|---------------------------------|----------|
| <b>Hard ASCVD (n=1,143; 25 events)</b>       |                                 |          |                                 |          |
| BAC Presence vs. Absence Model               |                                 |          |                                 |          |
| BAC > 0 mg vs. BAC = 0 mg                    | 1.95 (0.88-4.34)                | 0.10     | 1.91 (0.86-4.25)                | 0.11     |
| BAC Gradation Model                          |                                 |          |                                 |          |
| Tertile 1 when BAC is present vs. BAC = 0 mg | 2.10 (0.59-6.40)                | 0.19     | 2.25 (0.73-6.92)                | 0.16     |
| Tertile 2 when BAC is present vs. BAC = 0 mg | 2.01 (0.66-6.16)                | 0.22     | 1.86 (0.59-5.88)                | 0.29     |
| Tertile 3 when BAC is present vs. BAC = 0 mg | 1.71 (0.48-6.07)                | 0.40     | 1.62 (0.46-5.76)                | 0.46     |

|                                              |                  |      |                  |      |
|----------------------------------------------|------------------|------|------------------|------|
| <b>Global CVD (n=1,139; 70 events)</b>       |                  |      |                  |      |
| BAC Presence vs. Absence Model               |                  |      |                  |      |
| BAC > 0 mg vs. BAC = 0 mg                    | 1.05 (0.62-1.75) | 0.86 | 1.07 (0.64-1.80) | 0.80 |
| BAC Gradation Model                          |                  |      |                  |      |
| Tertile 1 when BAC is present vs. BAC = 0 mg | 1.23 (0.58-2.60) | 0.59 | 1.32 (0.62-2.80) | 0.47 |
| Tertile 2 when BAC is present vs. BAC = 0 mg | 1.13 (0.53-2.40) | 0.75 | 1.12 (0.52-2.40) | 0.77 |
| Tertile 3 when BAC is present vs. BAC = 0 mg | 0.77 (0.30-1.94) | 0.58 | 0.77 (0.31-1.97) | 0.59 |

\*age, race, education level

† + glycemic status, smoking, LDL-C and hypertension

BAC: breast arterial calcification; ASCVD: atherosclerotic cardiovascular disease; CVD: cardiovascular disease; HR: hazard ratio

**Table S8.** Hard ASCVD Age-adjusted Rates per 1,000 person-years According to PCE Risk Group, BAC Status and Use of Cholesterol Lowering Therapy.

| <b>Women not on Cholesterol Lowering Drugs (n=1,351)</b> |             |                 |            |
|----------------------------------------------------------|-------------|-----------------|------------|
| <b>PCE Risk Group</b>                                    | <b>BAC</b>  |                 | <b>All</b> |
|                                                          | <b>0 mg</b> | <b>&gt;0 mg</b> |            |
| Low (< 5)                                                | 1           | 1               | 2          |
|                                                          | 532         | 124             | 656        |
|                                                          | 0.20        | 0.70            | 0.30       |
| Borderline (5 to < 7.5)                                  | 7           | 2               | 9          |
|                                                          | 218         | 83              | 301        |
|                                                          | 4.86        | 3.91            | 4.55       |
| Intermediate (7.5 to < 20)                               | 12          | 6               | 18         |
|                                                          | 249         | 113             | 362        |
|                                                          | 10.59       | 14.88           | 11.62      |
| High (>= 20)                                             | 1           | 2               | 3          |
|                                                          | 17          | 15              | 32         |
|                                                          | 31.37       | 120.14          | 60.34      |
| All                                                      | 21          | 11              | 32         |
|                                                          | 1016        | 335             | 1351       |
|                                                          | 3.18        | 4.60            | 3.62       |
| <b>Women on Cholesterol Lowering Drugs (n=3,708)</b>     |             |                 |            |
| Low (< 5)                                                | 14          | 8               | 22         |
|                                                          | 811         | 219             | 1030       |
|                                                          | 2.70        | 5.79            | 3.45       |
| Borderline (5 to < 7.5)                                  | 18          | 4               | 22         |
|                                                          | 634         | 189             | 823        |
|                                                          | 4.30        | 3.11            | 4.02       |
| Intermediate (7.5 to < 20)                               | 35          | 28              | 63         |
|                                                          | 1074        | 448             | 1522       |
|                                                          | 4.84        | 8.41            | 5.74       |
| High (>= 20)                                             | 7           | 9               | 16         |
|                                                          | 186         | 147             | 333        |
|                                                          | 5.61        | 7.37            | 6.06       |
| All                                                      | 74          | 49              | 123        |
|                                                          | 2705        | 1003            | 3708       |
|                                                          | 3.98        | 6.34            | 4.60       |

Cell entries are (from top to bottom): number of events, number of subjects and age-adjusted ASCVD rate  
 BAC: breast arterial calcification; ASCVD: atherosclerotic cardiovascular disease; PCE: pooled cohorts equation.
